# Supplementary material for: Rare Earth Partition Characteristics and Sedimentary Diagenetic Response in Layered Argillaceous Limestone: Taking the Shale of Upper Es4 in the Nx55 Well Area as an Example
Source: Hindawi journal article supplement (doi:10.1155/2023/2248940), 2023-03-09
Supplement: f1 [file 2248940.f1.pdf]

## LA-ICPMS Elemental Analysis Results

WELL: NX55-X1

Sample serial number: depth: 3350.60 m

lithology: shale

| point | Na    | Mg  | Al    | Si     | S   | K   | Ca     | Mn     | Fe      | Cu     | Sr       | Pb      | Th   | U    |
|-------|-------|-----|-------|--------|-----|-----|--------|--------|---------|--------|----------|---------|------|------|
| μ g/g |       |     |       |        |     |     |        |        |         |        |          |         |      |      |
| 1     | 1471  | 184 | 4247  | 25144  | 251 | 11  | 460811 | 219.13 | 96.92   | 0.84   | 5009.33  | 0.25    | 0.01 | 0.01 |
| 2     | 1543  | 129 | 2176  | 23728  | 235 | 10  | 376343 | 275.30 | 99.26   | 0.56   | 5098.09  | 0.25    | 0.04 | 0.04 |
| 3     | 3540  | 210 | 28096 | 91495  | 569 | 146 | 333525 | 304.51 | 2261.77 | 220.20 | 4441.42  | 1033.36 | 2.77 | 2.29 |
| 4     | 3067  | 107 | 2151  | 26183  | 230 | 10  | 419124 | 198.55 | 96.01   | 0.68   | 5540.34  | 0.27    | 0.03 | 0.03 |
| 5     | 5542  | 261 | 39679 | 105030 | 244 | 120 | 218698 | 136.91 | 192.62  | 35.87  | 1911.88  | 8.10    | 3.99 | 3.14 |
| 6     | 1262  | 78  | 3943  | 28321  | 217 | 13  | 428800 | 82.68  | 82.14   | 0.70   | 7312.58  | 0.34    | 0.05 | 0.04 |
| 7     | 7458  | 581 | 53937 | 260838 | 265 | 348 | 68389  | 312.31 | 384.85  | 54.63  | 909.21   | 4.10    | 5.52 | 4.86 |
| 8     | 942   | 234 | 50122 | 246656 | 271 | 315 | 25371  | 49.83  | 154.93  | 31.25  | 540.10   | 21.85   | 4.88 | 4.07 |
| 9     | 5248  | 253 | 7744  | 27945  | 213 | 11  | 449464 | 110.45 | 85.25   | 1.11   | 11112.75 | 0.32    | 0.80 | 0.72 |
| 10    | 5863  | 251 | 39649 | 144193 | 232 | 200 | 310366 | 90.87  | 117.23  | 15.24  | 9788.68  | 29.37   | 1.57 | 1.61 |
| 11    | 2475  | 125 | 17164 | 54719  | 210 | 90  | 376522 | 73.53  | 83.36   | 5.65   | 4261.78  | 1.22    | 1.07 | 1.09 |
| 12    | 9310  | 364 | 5964  | 24263  | 196 | 9   | 430474 | 219.60 | 94.26   | 0.58   | 7136.55  | 0.30    | 0.08 | 0.07 |
| 13    | 403   | 161 | 4660  | 23235  | 189 | 9   | 448501 | 251.27 | 98.53   | 0.61   | 4134.75  | 0.72    | 0.00 | 0.00 |
| 14    | 805   | 599 | 37180 | 126983 | 204 | 166 | 232587 | 560.63 | 220.43  | 5.52   | 3780.76  | 2.30    | 4.92 | 4.36 |
| 15    | 949   | 170 | 8567  | 35314  | 189 | 11  | 400656 | 96.47  | 69.13   | 0.80   | 5467.58  | 6.48    | 3.31 | 2.89 |
| 16    | 1026  | 116 | 20540 | 73574  | 202 | 136 | 359445 | 138.72 | 98.43   | 8.48   | 6673.08  | 6.14    | 2.38 | 1.89 |
| 17    | 1311  | 195 | 46358 | 194449 | 346 | 268 | 78536  | 629.76 | 550.84  | 55.41  | 2778.89  | 28.98   | 4.35 | 3.92 |
| 18    | 299   | 118 | 46762 | 226507 | 214 | 362 | 37124  | 73.16  | 164.41  | 31.08  | 885.81   | 16.96   | 5.22 | 4.36 |
| 19    | 12603 | 535 | 53844 | 273920 | 218 | 412 | 14768  | 78.33  | 165.65  | 43.16  | 222.93   | 7.78    | 6.71 | 6.69 |
| 20    | 2145  | 318 | 35079 | 105270 | 193 | 112 | 317293 | 109.28 | 118.12  | 7.60   | 6683.21  | 1.50    | 4.32 | 3.13 |
| 21    | 3221  | 446 | 50412 | 195770 | 203 | 181 | 68522  | 99.65  | 136.17  | 36.98  | 814.99   | 10.47   | 5.16 | 5.14 |

## LA-ICPMS Elemental Analysis Results

WELL: NX55-X1

Sample serial number: depth: 3350.60 m

lithology: shale

| point           | La    | Ce     | Pr    | Nd    | Sm   | Eu   | Gd   | Tb   | Dy   | Ho   | Er   | Tm   | Yb   | Lu   |
|-----------------|-------|--------|-------|-------|------|------|------|------|------|------|------|------|------|------|
| $\mu\text{g/g}$ |       |        |       |       |      |      |      |      |      |      |      |      |      |      |
| 1               | 0.14  | 0.17   | 0.02  | 0.12  | 0.04 | 0.02 | 0.02 | 0.01 | 0.03 | 0.00 | 0.00 | 0.00 | 0.01 | 0.00 |
| 2               | 0.48  | 0.65   | 0.08  | 0.26  | 0.05 | 0.07 | 0.12 | 0.01 | 0.09 | 0.02 | 0.05 | 0.01 | 0.02 | 0.01 |
| 3               | 15.91 | 29.67  | 3.51  | 13.24 | 3.36 | 1.07 | 3.56 | 0.43 | 2.06 | 0.38 | 0.85 | 0.07 | 0.46 | 0.06 |
| 4               | 0.34  | 0.57   | 0.07  | 0.31  | 0.10 | 0.05 | 0.10 | 0.01 | 0.08 | 0.01 | 0.02 | 0.00 | 0.03 | 0.00 |
| 5               | 3.07  | 8.05   | 0.76  | 3.09  | 0.75 | 0.30 | 0.84 | 0.11 | 0.74 | 0.20 | 0.56 | 0.10 | 0.78 | 0.12 |
| 6               | 0.71  | 1.12   | 0.12  | 0.52  | 0.13 | 0.12 | 0.16 | 0.02 | 0.15 | 0.02 | 0.12 | 0.01 | 0.04 | 0.01 |
| 7               | 20.33 | 46.84  | 8.43  | 26.26 | 5.33 | 1.34 | 4.05 | 0.55 | 3.11 | 0.64 | 1.60 | 0.22 | 1.39 | 0.23 |
| 8               | 19.34 | 28.24  | 3.25  | 12.33 | 2.69 | 0.71 | 3.28 | 0.51 | 4.23 | 0.82 | 2.13 | 0.27 | 1.75 | 0.33 |
| 9               | 30.16 | 63.42  | 7.25  | 25.30 | 3.95 | 0.87 | 2.55 | 0.28 | 1.27 | 0.25 | 0.55 | 0.06 | 0.25 | 0.04 |
| 10              | 90.47 | 201.24 | 23.74 | 84.81 | 9.07 | 1.77 | 5.36 | 0.44 | 1.53 | 0.28 | 0.55 | 0.05 | 0.38 | 0.07 |
| 11              | 3.64  | 5.54   | 0.52  | 2.53  | 0.75 | 0.26 | 0.79 | 0.12 | 0.72 | 0.16 | 0.27 | 0.04 | 0.33 | 0.05 |
| 12              | 3.39  | 4.61   | 0.46  | 1.65  | 0.30 | 0.21 | 0.42 | 0.07 | 0.36 | 0.06 | 0.13 | 0.02 | 0.08 | 0.00 |
| 13              | 0.04  | 0.02   | 0.00  | 0.01  | 0.01 | 0.01 | 0.01 | 0.00 | 0.00 | 0.00 | 0.01 | 0.00 | 0.00 | 0.00 |
| 14              | 33.94 | 73.25  | 8.84  | 34.72 | 6.15 | 1.78 | 5.44 | 0.70 | 4.01 | 0.80 | 2.41 | 0.27 | 1.84 | 0.27 |
| 15              | 44.28 | 89.62  | 9.10  | 31.88 | 4.72 | 1.30 | 4.46 | 0.59 | 3.69 | 0.81 | 2.22 | 0.31 | 1.99 | 0.27 |
| 16              | 46.90 | 100.24 | 11.11 | 40.95 | 7.82 | 2.34 | 6.47 | 0.86 | 4.11 | 0.68 | 1.67 | 0.18 | 1.34 | 0.19 |
| 17              | 16.72 | 31.01  | 3.87  | 16.69 | 3.76 | 1.10 | 3.79 | 0.61 | 3.49 | 0.77 | 1.91 | 0.28 | 1.67 | 0.24 |
| 18              | 19.56 | 41.07  | 5.68  | 24.19 | 4.96 | 1.09 | 3.21 | 0.50 | 3.31 | 0.70 | 2.09 | 0.27 | 2.10 | 0.39 |
| 19              | 25.90 | 52.84  | 6.53  | 27.41 | 5.55 | 4.03 | 4.23 | 0.59 | 3.53 | 0.80 | 2.27 | 0.31 | 1.82 | 0.25 |
| 20              | 48.64 | 101.64 | 11.63 | 44.45 | 7.74 | 1.80 | 5.45 | 0.68 | 3.72 | 0.59 | 1.36 | 0.16 | 0.94 | 0.16 |
| 21              | 12.55 | 23.00  | 2.95  | 14.74 | 3.48 | 0.86 | 2.87 | 0.40 | 2.52 | 0.46 | 1.38 | 0.21 | 1.28 | 0.18 |
